# Supplementary material
Source: PubMed Central journal article supplement (PMC4862511)
Supplement: AAC.02928-15_zac005165159so1.pdf [file AAC.02928-15_zac005165159so1.pdf]

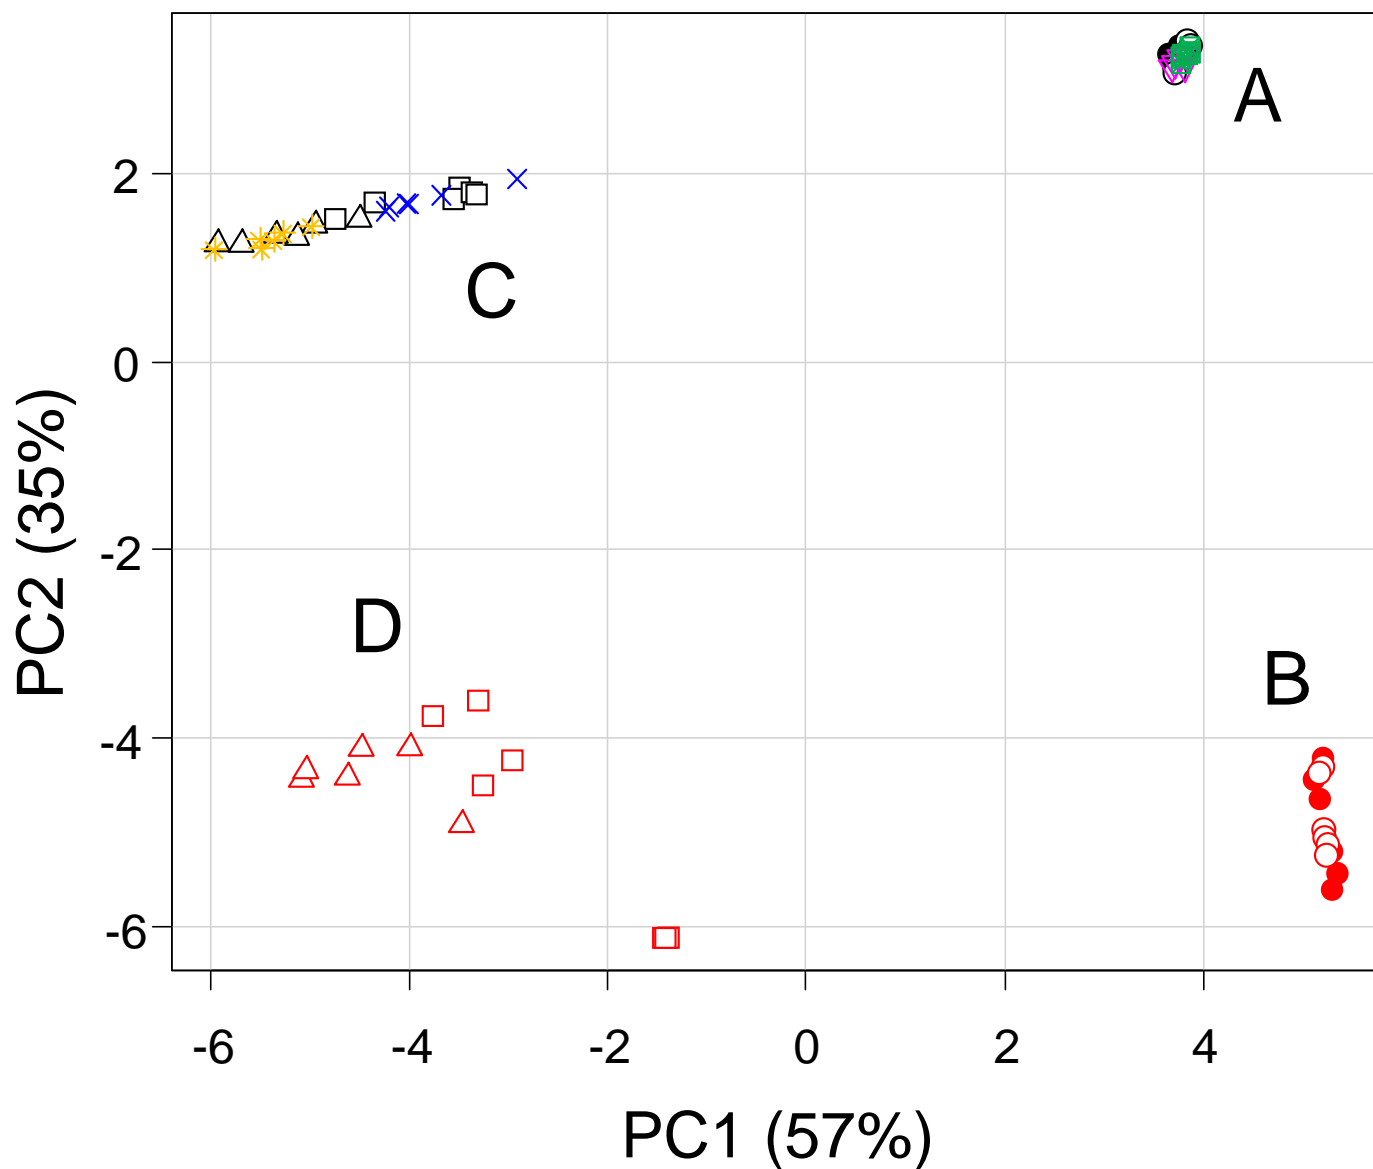

Supplementary Figure 1. Principal component analysis (PCA) of bacterial counts (Table 1 and Supplementary Table 1) determined by using 18 primers in saline-treated infected control group (Day 0: n=6 ●, Day 14: n=6 ●), BbY group (Day 0: n=6 □, Day 14: n=6 □), GOS group (Day 0: n=6 ○, Day 14: n=6 ○), BbY+GOS group (Day 0: n=6 △, Day 14: n=6 △), Antibiotics (AB)+5-FU group (n=6 ▽), AB+BbY+5-FU group (n=6 ×), AB+GOS+5-FU (n=6 ⊠), and AB+BbY+GOS+5-FU (n=6 ✱).

A: saline-treated infected control (Day 0), GOS (Day 0), AB+5-FU, AB+GOS+5-FU

B: saline-treated infected control (Day 14), GOS (Day 14)

C: BbY (Day 0), BbY+GOS (Day 0), AB+BbY+5-FU, AB+BbY+GOS+5-FU

D: BbY (Day 14), BbY+GOS (Day 14)

Supplementary Table 1

| Organisms                           | Number of bacteria in the cecal contents (Day 14) <sup>a)</sup> |                                                    |                                                    |                                                            |
|-------------------------------------|-----------------------------------------------------------------|----------------------------------------------------|----------------------------------------------------|------------------------------------------------------------|
|                                     | Antibiotics<br>+ 5-FU <sup>b, c)</sup>                          | Antibiotics<br>+ BbY<br>+ 5-FU <sup>b, c, d)</sup> | Antibiotics<br>+ GOS<br>+ 5-FU <sup>b, c, e)</sup> | Antibiotics<br>+ BbY+ GOS<br>+ 5-FU <sup>b, c, d, e)</sup> |
| Total bacteria                      | 8.2±0.3                                                         | 8.6±0.3                                            | 8.1±0.3                                            | 9.5±0.2                                                    |
| <i>Clostridium coccooides</i> group | 6.7±0.5                                                         | 6.5±0.6                                            | 6.6±0.8                                            | 6.5±0.5                                                    |
| <i>C. leptum</i> subgroup           | 6.2±0.3                                                         | 6.0±0.4                                            | 6.0±0.3                                            | 6.2±0.5                                                    |
| <i>Bacteroides fragilis</i> group   | 6.5±0.4                                                         | 6.4±0.5                                            | 6.3±0.1                                            | 6.5±0.4                                                    |
| <i>Bifidobacterium</i>              | <5.0                                                            | 8.3±0.2                                            | <5.0                                               | 9.4±0.2                                                    |
| <i>Atopobium</i> cluster            | <5.0                                                            | <5.0                                               | <5.0                                               | <5.0                                                       |
| <i>Prevotella</i>                   | <5.0                                                            | <5.0                                               | <5.0                                               | <5.0                                                       |
| Total <i>Lactobacillus</i>          | 5.9±0.8                                                         | 6.0±0.5                                            | 5.7±0.5                                            | 5.7±0.5                                                    |
| <i>Enterobacteriaceae</i>           | <4.0                                                            | <4.0                                               | <4.0                                               | <4.0                                                       |
| <i>Enterococcus</i>                 | 8.1±0.4                                                         | 8.0±0.6                                            | 8.0±0.5                                            | 8.2±0.7                                                    |
| <i>Staphylococcus</i>               | 4.2±0.4                                                         | 4.0±0.3                                            | 4.1±0.2                                            | 3.9±0.3                                                    |
| BbY                                 | <2.0                                                            | 8.1±0.4                                            | <2.0                                               | 9.2±0.2                                                    |
| MDRAb                               | <2.0                                                            | <2.0                                               | <2.0                                               | <2.0                                                       |

<sup>a)</sup> The results are expressed as mean Log<sub>10</sub> cells ± SD per g of the cecal contents for 6 mice.

<sup>b)</sup> The antibiotics (KM, CTM, LOM, MTN, and IPM) were given to mice from Day -7 until Day 14.

<sup>c)</sup> On Day 4, animals were injected intraperitoneally with 5-FU at a dose of 400 mg/kg body weight.

<sup>d)</sup> BbY (2-3 x 10<sup>8</sup> CFU/mouse/day) was administered to mice once daily from Day -7 until Day 14.

<sup>e)</sup> GOS (10 mg/mouse/day) was administered to mice once daily from Day -7 until Day 14.
